# Supplementary material for: A nonparametric multiple imputation approach for missing categorical data
Source: Springer Nature journal article supplement (doi:10.1186/s12874-017-0360-2), 2017-06-06
Supplement: MOESM1 [file 12342494]

Supplementary Materials for 'A Nonparametric Multiple Imputation  
Approach for Missing Categorical Data'

Table S1 Simulation results from probability estimation for  $Y$ , where  $Y$  is generated using a probit link function with five covariates,  $\delta$  is generated using a logit link function with extreme missingness probabilities (M2) based on five covariates,  $N = 400$

| Method                      | $Pr(Y = 1)=0.297$ |       |       |                               | $Pr(Y = 2)=0.250$                                         |       |       |       |
|-----------------------------|-------------------|-------|-------|-------------------------------|-----------------------------------------------------------|-------|-------|-------|
|                             | Est               | SD    | SE    | CR                            | Est                                                       | SD    | SE    | CR    |
| FO                          | 0.298             | 0.023 | 0.023 | 0.952                         | 0.249                                                     | 0.021 | 0.022 | 0.974 |
| CC                          | 0.310             | 0.031 | 0.031 | 0.938                         | 0.334                                                     | 0.031 | 0.032 | 0.230 |
|                             |                   |       |       | Working models for $Y$ :      | Five covariates with logit link (misspecified scenario 3) |       |       |       |
|                             |                   |       |       | Working models for $\delta$ : | Five covariates with logit link                           |       |       |       |
| CE                          | 0.293             | 0.151 | 0.104 | 0.954                         | 0.218                                                     | 0.091 | 0.089 | 0.968 |
| PMI                         | 0.302             | 0.039 | 0.039 | 0.926                         | 0.306                                                     | 0.038 | 0.039 | 0.696 |
| $NNMI_{MLR}(5,0.4,0.4;0.2)$ | 0.302             | 0.042 | 0.042 | 0.932                         | 0.281                                                     | 0.039 | 0.040 | 0.904 |
| $NNMI_{MLR}(5,0.1,0.7;0.2)$ | 0.308             | 0.044 | 0.045 | 0.914                         | 0.279                                                     | 0.039 | 0.041 | 0.922 |
| $NNMI_{MLR}(5,0.7,0.1;0.2)$ | 0.300             | 0.042 | 0.042 | 0.926                         | 0.284                                                     | 0.039 | 0.041 | 0.908 |
| $NNMI_{CLR}(5,0.4,0.4;0.2)$ | 0.299             | 0.042 | 0.041 | 0.914                         | 0.285                                                     | 0.039 | 0.041 | 0.910 |
| $NNMI_{CLR}(5,0.1,0.7;0.2)$ | 0.296             | 0.043 | 0.042 | 0.920                         | 0.285                                                     | 0.039 | 0.041 | 0.894 |
| $NNMI_{CLR}(5,0.7,0.1;0.2)$ | 0.301             | 0.042 | 0.042 | 0.922                         | 0.284                                                     | 0.038 | 0.041 | 0.914 |

Est: Estimates of probabilities; SD: Empirical standard deviation; SE: Estimate of standard error; CR: Coverage rate of 95% confidence intervals; FO: fully observed; CC: Complete Cases; CE: Calibration estimator; PMI: Parametric Multiple Imputation;  $NNMI_{MLR}(NN, \omega_1, \omega_2; \omega_3)$ : the NNMI method using Multinomial Logistic Regressions, NN is the number of nearest neighbors and weights are  $\omega_1, \omega_2$ , and  $\omega_3$ ;  $NNMI_{CLR}$ : the NNMI method using Cumulative Logistic Regressions;  $K = 10$  imputed datasets are used for PMI and NNMI methods.

Table S2 Simulation results from probability estimation for  $Y$ , where  $Y$  is generated using a logit link function with five covariates,  $\delta$  is generated using a probit link function with extreme missingness probabilities (M2) based on five covariates,  $N = 400$

| Method                      | $Pr(Y = 1)=0.386$ |       |       |                               | $Pr(Y = 2)=0.288$ |       |       |                                                              |
|-----------------------------|-------------------|-------|-------|-------------------------------|-------------------|-------|-------|--------------------------------------------------------------|
|                             | Est               | SD    | SE    | CR                            | Est               | SD    | SE    | CR                                                           |
| FO                          | 0.386             | 0.023 | 0.024 | 0.960                         | 0.286             | 0.023 | 0.023 | 0.934                                                        |
| CC                          | 0.429             | 0.031 | 0.033 | 0.782                         | 0.381             | 0.033 | 0.033 | 0.184                                                        |
|                             |                   |       |       | Working models for $Y$ :      |                   |       |       | Five covariates with logit link                              |
|                             |                   |       |       | Working models for $\delta$ : |                   |       |       | Five covariates with logit link<br>(misspecified scenario 4) |
| CE                          | 0.386             | 0.122 | 0.098 | 0.970                         | 0.282             | 0.080 | 0.078 | 0.922                                                        |
| PMI                         | 0.386             | 0.035 | 0.038 | 0.966                         | 0.289             | 0.037 | 0.035 | 0.922                                                        |
| $NNMI_{MLR}(5,0.4,0.4;0.2)$ | 0.396             | 0.044 | 0.048 | 0.946                         | 0.304             | 0.048 | 0.047 | 0.906                                                        |
| $NNMI_{MLR}(5,0.1,0.7;0.2)$ | 0.415             | 0.051 | 0.055 | 0.918                         | 0.298             | 0.047 | 0.046 | 0.898                                                        |
| $NNMI_{MLR}(5,0.7,0.1;0.2)$ | 0.390             | 0.042 | 0.045 | 0.944                         | 0.313             | 0.051 | 0.050 | 0.914                                                        |
| $NNMI_{CLR}(5,0.4,0.4;0.2)$ | 0.388             | 0.040 | 0.043 | 0.952                         | 0.313             | 0.049 | 0.048 | 0.892                                                        |
| $NNMI_{CLR}(5,0.1,0.7;0.2)$ | 0.371             | 0.042 | 0.044 | 0.916                         | 0.318             | 0.049 | 0.049 | 0.912                                                        |
| $NNMI_{CLR}(5,0.7,0.1;0.2)$ | 0.401             | 0.041 | 0.044 | 0.936                         | 0.315             | 0.048 | 0.048 | 0.918                                                        |

Est: Estimates of probabilities; SD: Empirical standard deviation; SE: Estimate of standard error; CR: Coverage rate of 95% confidence intervals; FO: fully observed; CC: Complete Cases; CE: Calibration estimator; PMI: Parametric Multiple Imputation;  $NNMI_{MLR}(NN, \omega_1, \omega_2, \omega_3)$ : the NNMI method using Multinomial Logistic Regressions, NN is the number of nearest neighbors and weights are  $\omega_1, \omega_2$ , and  $\omega_3$ ;  $NNMI_{CLR}$ : the NNMI method using Cumulative Logistic Regressions;  $K = 10$  imputed datasets are used for PMI and NNMI methods.

Table S3 Simulation results from probability estimation for  $Y$ , where  $Y$  is generated using a probit link function with five covariates,  $\delta$  is generated using a probit link function with extreme missingness probabilities (M2) based on five covariates,  $N = 400$

| Method                      | $Pr(Y = 1)=0.297$ |       |       |                               | $Pr(Y = 2)=0.250$ |       |       |                                                              |
|-----------------------------|-------------------|-------|-------|-------------------------------|-------------------|-------|-------|--------------------------------------------------------------|
|                             | Est               | SD    | SE    | CR                            | Est               | SD    | SE    | CR                                                           |
| FO                          | 0.298             | 0.023 | 0.023 | 0.952                         | 0.249             | 0.021 | 0.022 | 0.974                                                        |
| CC                          | 0.310             | 0.031 | 0.031 | 0.924                         | 0.343             | 0.031 | 0.032 | 0.156                                                        |
|                             |                   |       |       | Working models for $Y$ :      |                   |       |       | Five covariates with logit link<br>(misspecified scenario 5) |
|                             |                   |       |       | Working models for $\delta$ : |                   |       |       | Five covariates with logit link<br>(misspecified scenario 5) |
| CE                          | 0.311             | 0.131 | 0.106 | 0.964                         | 0.274             | 0.123 | 0.105 | 0.934                                                        |
| PMI                         | 0.301             | 0.042 | 0.042 | 0.932                         | 0.323             | 0.043 | 0.044 | 0.616                                                        |
| $NNMI_{MLR}(5,0.4,0.4;0.2)$ | 0.305             | 0.049 | 0.050 | 0.940                         | 0.300             | 0.047 | 0.050 | 0.870                                                        |
| $NNMI_{MLR}(5,0.1,0.7;0.2)$ | 0.312             | 0.050 | 0.053 | 0.948                         | 0.297             | 0.047 | 0.051 | 0.908                                                        |
| $NNMI_{MLR}(5,0.7,0.1;0.2)$ | 0.302             | 0.048 | 0.050 | 0.928                         | 0.301             | 0.047 | 0.050 | 0.874                                                        |
| $NNMI_{CLR}(5,0.4,0.4;0.2)$ | 0.302             | 0.048 | 0.050 | 0.936                         | 0.302             | 0.047 | 0.050 | 0.864                                                        |
| $NNMI_{CLR}(5,0.1,0.7;0.2)$ | 0.301             | 0.049 | 0.051 | 0.948                         | 0.302             | 0.048 | 0.050 | 0.854                                                        |
| $NNMI_{CLR}(5,0.7,0.1;0.2)$ | 0.303             | 0.049 | 0.050 | 0.930                         | 0.303             | 0.047 | 0.051 | 0.876                                                        |

Est: Estimates of probabilities; SD: Empirical standard deviation; SE: Estimate of standard error; CR: Coverage rate of 95% confidence intervals; FO: fully observed; CC: Complete Cases; CE: Calibration estimator; PMI: Parametric Multiple Imputation;  $NNMI_{MLR}(NN, \omega_1, \omega_2, \omega_3)$ : the NNMI method using Multinomial Logistic Regressions, NN is the number of nearest neighbors and weights are  $\omega_1, \omega_2$ , and  $\omega_3$ ;  $NNMI_{CLR}$ : the NNMI method using Cumulative Logistic Regressions;  $K = 10$  imputed datasets are used for PMI and NNMI methods.

Table S4 Simulation results from probability estimation for  $Y$ , where  $Y$  is generated using a logit link function with five covariates,  $\delta$  is generated using a logit link function with not extreme missingness probabilities (M1) based on five covariates,  $N = 200$

| Method                      | $Pr(Y = 1) = 0.386$ |                               |       |       | $Pr(Y = 2) = 0.288$ |                                                            |       |       |  |
|-----------------------------|---------------------|-------------------------------|-------|-------|---------------------|------------------------------------------------------------|-------|-------|--|
|                             | Est                 | SD                            | SE    | CR    | Est                 | SD                                                         | SE    | CR    |  |
| FO                          | 0.388               | 0.035                         | 0.034 | 0.950 | 0.286               | 0.033                                                      | 0.032 | 0.936 |  |
| CC                          | 0.443               | 0.052                         | 0.050 | 0.792 | 0.338               | 0.051                                                      | 0.047 | 0.804 |  |
|                             |                     | Working models for $Y$ :      |       |       |                     | Five covariates with logit link                            |       |       |  |
|                             |                     | Working models for $\delta$ : |       |       |                     | Five covariates with logit link                            |       |       |  |
| CE                          | 0.387               | 0.052                         | 0.053 | 0.952 | 0.286               | 0.056                                                      | 0.054 | 0.926 |  |
| PMI                         | 0.388               | 0.046                         | 0.045 | 0.942 | 0.287               | 0.048                                                      | 0.045 | 0.924 |  |
| $NNMI_{MLR}(5,0.4,0.4;0.2)$ | 0.390               | 0.048                         | 0.047 | 0.936 | 0.291               | 0.050                                                      | 0.048 | 0.932 |  |
| $NNMI_{MLR}(5,0.1,0.7;0.2)$ | 0.396               | 0.049                         | 0.050 | 0.940 | 0.288               | 0.049                                                      | 0.047 | 0.932 |  |
| $NNMI_{MLR}(5,0.7,0.1;0.2)$ | 0.388               | 0.048                         | 0.047 | 0.940 | 0.294               | 0.052                                                      | 0.048 | 0.922 |  |
| $NNMI_{CLR}(5,0.4,0.4;0.2)$ | 0.386               | 0.047                         | 0.047 | 0.964 | 0.300               | 0.052                                                      | 0.049 | 0.926 |  |
| $NNMI_{CLR}(5,0.1,0.7;0.2)$ | 0.381               | 0.048                         | 0.047 | 0.920 | 0.300               | 0.052                                                      | 0.049 | 0.908 |  |
| $NNMI_{CLR}(5,0.7,0.1;0.2)$ | 0.393               | 0.047                         | 0.047 | 0.942 | 0.300               | 0.052                                                      | 0.049 | 0.930 |  |
|                             |                     | Working models for $Y$ :      |       |       |                     | Three covariates with logit link (misspecified scenario 1) |       |       |  |
|                             |                     | Working models for $\delta$ : |       |       |                     | Five covariates with logit link                            |       |       |  |
| CE                          | 0.306               | 0.084                         | 0.095 | 0.944 | 0.288               | 0.061                                                      | 0.062 | 0.942 |  |
| PMI                         | 0.466               | 0.055                         | 0.054 | 0.672 | 0.285               | 0.047                                                      | 0.044 | 0.912 |  |
| $NNMI_{MLR}(5,0.4,0.4;0.2)$ | 0.419               | 0.049                         | 0.055 | 0.924 | 0.292               | 0.050                                                      | 0.047 | 0.926 |  |
| $NNMI_{MLR}(5,0.1,0.7;0.2)$ | 0.418               | 0.050                         | 0.055 | 0.924 | 0.290               | 0.049                                                      | 0.047 | 0.922 |  |
| $NNMI_{MLR}(5,0.7,0.1;0.2)$ | 0.418               | 0.050                         | 0.055 | 0.920 | 0.294               | 0.050                                                      | 0.048 | 0.940 |  |
| $NNMI_{CLR}(5,0.4,0.4;0.2)$ | 0.424               | 0.050                         | 0.054 | 0.898 | 0.295               | 0.050                                                      | 0.047 | 0.918 |  |
| $NNMI_{CLR}(5,0.1,0.7;0.2)$ | 0.419               | 0.050                         | 0.054 | 0.912 | 0.295               | 0.050                                                      | 0.048 | 0.932 |  |
| $NNMI_{CLR}(5,0.7,0.1;0.2)$ | 0.424               | 0.050                         | 0.055 | 0.916 | 0.295               | 0.050                                                      | 0.048 | 0.932 |  |
|                             |                     | Working models for $Y$ :      |       |       |                     | Five covariates with logit link                            |       |       |  |
|                             |                     | Working models for $\delta$ : |       |       |                     | Three covariates with logit link (misspecified scenario 2) |       |       |  |
| CE                          | 0.389               | 0.048                         | 0.048 | 0.944 | 0.285               | 0.051                                                      | 0.047 | 0.934 |  |
| PMI                         | 0.388               | 0.046                         | 0.045 | 0.942 | 0.287               | 0.048                                                      | 0.045 | 0.924 |  |
| $NNMI_{MLR}(5,0.4,0.4;0.2)$ | 0.396               | 0.048                         | 0.048 | 0.932 | 0.294               | 0.051                                                      | 0.048 | 0.930 |  |
| $NNMI_{MLR}(5,0.1,0.7;0.2)$ | 0.411               | 0.050                         | 0.051 | 0.936 | 0.290               | 0.049                                                      | 0.046 | 0.908 |  |
| $NNMI_{MLR}(5,0.7,0.1;0.2)$ | 0.392               | 0.048                         | 0.047 | 0.932 | 0.301               | 0.052                                                      | 0.049 | 0.924 |  |
| $NNMI_{CLR}(5,0.4,0.4;0.2)$ | 0.390               | 0.047                         | 0.047 | 0.930 | 0.301               | 0.051                                                      | 0.047 | 0.926 |  |
| $NNMI_{CLR}(5,0.1,0.7;0.2)$ | 0.384               | 0.049                         | 0.047 | 0.936 | 0.298               | 0.050                                                      | 0.047 | 0.928 |  |
| $NNMI_{CLR}(5,0.7,0.1;0.2)$ | 0.396               | 0.047                         | 0.047 | 0.944 | 0.307               | 0.051                                                      | 0.048 | 0.920 |  |

Est: Estimates of probabilities; SD: Empirical standard deviation; SE: Estimate of standard error; CR: Coverage rate of 95% confidence intervals; FO: fully observed; CC: Complete Cases; CE: Calibration estimator; PMI: Parametric Multiple Imputation;  $NNMI_{MLR}(NN, \omega_1, \omega_2, \omega_3)$ : the NNMI method using Multinomial Logistic Regressions, NN is the number of nearest neighbors and weights are  $\omega_1, \omega_2$ , and  $\omega_3$ ;  $NNMI_{CLR}$ : the NNMI method using Cumulative Logistic Regressions;  $K = 10$  imputed datasets are used for PMI and NNMI methods.

Table S5 Simulation results from probability estimation for  $Y$ , where  $Y$  is generated using a probit link function with five covariates,  $\delta$  is generated using a logit link function with not extreme missingness probabilities (M1) based on five covariates,  $N = 200$

| Method                      | $Pr(Y = 1)=0.297$ |                               |       |       | $Pr(Y = 2)=0.250$ |                                                              |       |       |  |
|-----------------------------|-------------------|-------------------------------|-------|-------|-------------------|--------------------------------------------------------------|-------|-------|--|
|                             | Est               | SD                            | SE    | CR    | Est               | SD                                                           | SE    | CR    |  |
| FO                          | 0.297             | 0.033                         | 0.032 | 0.950 | 0.248             | 0.030                                                        | 0.030 | 0.956 |  |
| CC                          | 0.317             | 0.044                         | 0.046 | 0.944 | 0.303             | 0.046                                                        | 0.046 | 0.812 |  |
|                             |                   | Working models for $Y$ :      |       |       |                   | Five covariates with logit link<br>(misspecified scenario 3) |       |       |  |
|                             |                   | Working models for $\delta$ : |       |       |                   | Five covariates with logit link                              |       |       |  |
| CE                          | 0.289             | 0.052                         | 0.058 | 0.964 | 0.228             | 0.046                                                        | 0.052 | 0.938 |  |
| PMI                         | 0.306             | 0.047                         | 0.049 | 0.960 | 0.270             | 0.046                                                        | 0.047 | 0.946 |  |
| $NNMI_{MLR}(5,0.4,0.4;0.2)$ | 0.300             | 0.048                         | 0.049 | 0.960 | 0.264             | 0.048                                                        | 0.046 | 0.940 |  |
| $NNMI_{MLR}(5,0.1,0.7;0.2)$ | 0.302             | 0.048                         | 0.050 | 0.950 | 0.263             | 0.048                                                        | 0.046 | 0.960 |  |
| $NNMI_{MLR}(5,0.7,0.1;0.2)$ | 0.300             | 0.047                         | 0.049 | 0.944 | 0.266             | 0.046                                                        | 0.047 | 0.948 |  |
| $NNMI_{CLR}(5,0.4,0.4;0.2)$ | 0.300             | 0.047                         | 0.050 | 0.954 | 0.268             | 0.047                                                        | 0.047 | 0.946 |  |
| $NNMI_{CLR}(5,0.1,0.7;0.2)$ | 0.297             | 0.048                         | 0.050 | 0.944 | 0.269             | 0.047                                                        | 0.048 | 0.938 |  |
| $NNMI_{CLR}(5,0.7,0.1;0.2)$ | 0.301             | 0.049                         | 0.049 | 0.936 | 0.269             | 0.048                                                        | 0.047 | 0.948 |  |

Est: Estimates of probabilities; SD: Empirical standard deviation; SE: Estimate of standard error; CR: Coverage rate of 95% confidence intervals; FO: fully observed; CC: Complete Cases; CE: Calibration estimator; PMI: Parametric Multiple Imputation;  $NNMI_{MLR}(NN, \omega_1, \omega_2; \omega_3)$ : the NNMI method using Multinomial Logistic Regressions, NN is the number of nearest neighbors and weights are  $\omega_1, \omega_2$ , and  $\omega_3$ ;  $NNMI_{CLR}$ : the NNMI method using Cumulative Logistic Regressions;  $K = 10$  imputed datasets are used for PMI and NNMI methods.

Table S6 Simulation results from probability estimation for  $Y$ , where  $Y$  is generated using a logit link function with five covariates,  $\delta$  is generated using a probit link function with not extreme missingness probabilities (M1) based on five covariates,  $N = 200$

| Method                      | $Pr(Y = 1)=0.386$ |                               |       |       | $Pr(Y = 2)=0.288$                                            |       |       |       |
|-----------------------------|-------------------|-------------------------------|-------|-------|--------------------------------------------------------------|-------|-------|-------|
|                             | Est               | SD                            | SE    | CR    | Est                                                          | SD    | SE    | CR    |
| FO                          | 0.388             | 0.035                         | 0.034 | 0.950 | 0.286                                                        | 0.033 | 0.032 | 0.936 |
| CC                          | 0.458             | 0.051                         | 0.050 | 0.678 | 0.357                                                        | 0.051 | 0.048 | 0.696 |
|                             |                   | Working models for $Y$ :      |       |       | Five covariates with logit link                              |       |       |       |
|                             |                   | Working models for $\delta$ : |       |       | Five covariates with logit link<br>(misspecified scenario 4) |       |       |       |
| CE                          | 0.386             | 0.073                         | 0.077 | 0.974 | 0.287                                                        | 0.082 | 0.084 | 0.936 |
| PMI                         | 0.388             | 0.049                         | 0.049 | 0.960 | 0.289                                                        | 0.050 | 0.049 | 0.940 |
| $NNMI_{MLR}(5,0.4,0.4;0.2)$ | 0.393             | 0.052                         | 0.053 | 0.948 | 0.299                                                        | 0.056 | 0.054 | 0.926 |
| $NNMI_{MLR}(5,0.1,0.7;0.2)$ | 0.405             | 0.054                         | 0.058 | 0.942 | 0.293                                                        | 0.053 | 0.053 | 0.922 |
| $NNMI_{MLR}(5,0.7,0.1;0.2)$ | 0.389             | 0.051                         | 0.052 | 0.942 | 0.304                                                        | 0.056 | 0.056 | 0.934 |
| $NNMI_{CLR}(5,0.4,0.4;0.2)$ | 0.389             | 0.050                         | 0.051 | 0.952 | 0.309                                                        | 0.056 | 0.056 | 0.946 |
| $NNMI_{CLR}(5,0.1,0.7;0.2)$ | 0.380             | 0.051                         | 0.052 | 0.924 | 0.308                                                        | 0.056 | 0.055 | 0.926 |
| $NNMI_{CLR}(5,0.7,0.1;0.2)$ | 0.399             | 0.051                         | 0.052 | 0.948 | 0.310                                                        | 0.055 | 0.056 | 0.930 |

Est: Estimates of probabilities; SD: Empirical standard deviation; SE: Estimate of standard error; CR: Coverage rate of 95% confidence intervals; FO: fully observed; CC: Complete Cases; CE: Calibration estimator; PMI: Parametric Multiple Imputation;  $NNMI_{MLR}(NN, \omega_1, \omega_2, \omega_3)$ : the NNMI method using Multinomial Logistic Regressions, NN is the number of nearest neighbors and weights are  $\omega_1, \omega_2$ , and  $\omega_3$ ;  $NNMI_{CLR}$ : the NNMI method using Cumulative Logistic Regressions;  $K = 10$  imputed datasets are used for PMI and NNMI methods.

Table S7 Simulation results from probability estimation for  $Y$ , where  $Y$  is generated using a probit link function with five covariates,  $\delta$  is generated using a probit link function with not extreme missingness probabilities (M1) based on five covariates,  $N = 200$

| Method                      | $Pr(Y = 1)=0.297$ |                               |       |       | $Pr(Y = 2)=0.250$                                            |       |       |       |
|-----------------------------|-------------------|-------------------------------|-------|-------|--------------------------------------------------------------|-------|-------|-------|
|                             | Est               | SD                            | SE    | CR    | Est                                                          | SD    | SE    | CR    |
| FO                          | 0.297             | 0.033                         | 0.032 | 0.950 | 0.248                                                        | 0.030 | 0.030 | 0.956 |
| CC                          | 0.323             | 0.044                         | 0.047 | 0.928 | 0.324                                                        | 0.047 | 0.047 | 0.692 |
|                             |                   | Working models for $Y$ :      |       |       | Five covariates with logit link<br>(misspecified scenario 5) |       |       |       |
|                             |                   | Working models for $\delta$ : |       |       | Five covariates with logit link<br>(misspecified scenario 5) |       |       |       |
| CE                          | 0.298             | 0.098                         | 0.105 | 0.968 | 0.217                                                        | 0.078 | 0.097 | 0.966 |
| PMI                         | 0.315             | 0.054                         | 0.056 | 0.930 | 0.297                                                        | 0.054 | 0.055 | 0.894 |
| $NNMI_{MLR}(5,0.4,0.4;0.2)$ | 0.311             | 0.056                         | 0.057 | 0.928 | 0.285                                                        | 0.054 | 0.056 | 0.932 |
| $NNMI_{MLR}(5,0.1,0.7;0.2)$ | 0.315             | 0.056                         | 0.059 | 0.952 | 0.283                                                        | 0.054 | 0.055 | 0.928 |
| $NNMI_{MLR}(5,0.7,0.1;0.2)$ | 0.311             | 0.056                         | 0.058 | 0.934 | 0.285                                                        | 0.052 | 0.056 | 0.950 |
| $NNMI_{CLR}(5,0.4,0.4;0.2)$ | 0.311             | 0.056                         | 0.058 | 0.946 | 0.289                                                        | 0.053 | 0.055 | 0.910 |
| $NNMI_{CLR}(5,0.1,0.7;0.2)$ | 0.308             | 0.055                         | 0.057 | 0.934 | 0.288                                                        | 0.051 | 0.055 | 0.926 |
| $NNMI_{CLR}(5,0.7,0.1;0.2)$ | 0.313             | 0.058                         | 0.059 | 0.932 | 0.288                                                        | 0.053 | 0.056 | 0.932 |

Est: Estimates of probabilities; SD: Empirical standard deviation; SE: Estimate of standard error; CR: Coverage rate of 95% confidence intervals; FO: fully observed; CC: Complete Cases; CE: Calibration estimator; PMI: Parametric Multiple Imputation;  $NNMI_{MLR}(NN, \omega_1, \omega_2, \omega_3)$ : the NNMI method using Multinomial Logistic Regressions, NN is the number of nearest neighbors and weights are  $\omega_1, \omega_2$ , and  $\omega_3$ ;  $NNMI_{CLR}$ : the NNMI method using Cumulative Logistic Regressions;  $K = 10$  imputed datasets are used for PMI and NNMI methods.

Table S8 Simulation results from probability estimation for  $Y$ , where  $Y$  is generated using a logit link function with five covariates,  $\delta$  is generated using a logit link function with extreme missingness probabilities (M2) based on five covariates,  $N = 200$

| Method                      | $Pr(Y = 1)=0.386$ |                               |       |       | $Pr(Y = 2)=0.288$ |                                                            |       |       |  |
|-----------------------------|-------------------|-------------------------------|-------|-------|-------------------|------------------------------------------------------------|-------|-------|--|
|                             | Est               | SD                            | SE    | CR    | Est               | SD                                                         | SE    | CR    |  |
| FO                          | 0.388             | 0.035                         | 0.034 | 0.950 | 0.286             | 0.033                                                      | 0.032 | 0.936 |  |
| CC                          | 0.428             | 0.049                         | 0.047 | 0.846 | 0.374             | 0.048                                                      | 0.046 | 0.562 |  |
|                             |                   | Working models for $Y$ :      |       |       |                   | Five covariates with logit link                            |       |       |  |
|                             |                   | Working models for $\delta$ : |       |       |                   | Five covariates with logit link                            |       |       |  |
| CE                          | 0.382             | 0.110                         | 0.132 | 0.964 | 0.282             | 0.103                                                      | 0.120 | 0.954 |  |
| PMI                         | 0.387             | 0.052                         | 0.050 | 0.918 | 0.292             | 0.048                                                      | 0.047 | 0.934 |  |
| $NNMI_{MLR}(5,0.4,0.4;0.2)$ | 0.390             | 0.056                         | 0.055 | 0.920 | 0.303             | 0.053                                                      | 0.054 | 0.952 |  |
| $NNMI_{MLR}(5,0.1,0.7;0.2)$ | 0.405             | 0.058                         | 0.063 | 0.948 | 0.298             | 0.051                                                      | 0.053 | 0.948 |  |
| $NNMI_{MLR}(5,0.7,0.1;0.2)$ | 0.387             | 0.054                         | 0.054 | 0.934 | 0.311             | 0.056                                                      | 0.057 | 0.932 |  |
| $NNMI_{CLR}(5,0.4,0.4;0.2)$ | 0.387             | 0.053                         | 0.053 | 0.936 | 0.312             | 0.053                                                      | 0.055 | 0.942 |  |
| $NNMI_{CLR}(5,0.1,0.7;0.2)$ | 0.374             | 0.054                         | 0.054 | 0.906 | 0.313             | 0.053                                                      | 0.056 | 0.936 |  |
| $NNMI_{CLR}(5,0.7,0.1;0.2)$ | 0.398             | 0.054                         | 0.054 | 0.942 | 0.315             | 0.054                                                      | 0.057 | 0.924 |  |
|                             |                   | Working models for $Y$ :      |       |       |                   | Three covariates with logit link (misspecified scenario 1) |       |       |  |
|                             |                   | Working models for $\delta$ : |       |       |                   | Five covariates with logit link                            |       |       |  |
| CE                          | 0.313             | 0.273                         | 0.327 | 0.968 | 0.283             | 0.114                                                      | 0.133 | 0.964 |  |
| PMI                         | 0.492             | 0.059                         | 0.058 | 0.538 | 0.291             | 0.045                                                      | 0.045 | 0.936 |  |
| $NNMI_{MLR}(5,0.4,0.4;0.2)$ | 0.439             | 0.061                         | 0.068 | 0.898 | 0.301             | 0.052                                                      | 0.054 | 0.944 |  |
| $NNMI_{MLR}(5,0.1,0.7;0.2)$ | 0.435             | 0.061                         | 0.069 | 0.906 | 0.299             | 0.052                                                      | 0.054 | 0.938 |  |
| $NNMI_{MLR}(5,0.7,0.1;0.2)$ | 0.437             | 0.061                         | 0.068 | 0.898 | 0.305             | 0.053                                                      | 0.056 | 0.940 |  |
| $NNMI_{CLR}(5,0.4,0.4;0.2)$ | 0.444             | 0.058                         | 0.065 | 0.860 | 0.304             | 0.052                                                      | 0.054 | 0.940 |  |
| $NNMI_{CLR}(5,0.1,0.7;0.2)$ | 0.431             | 0.057                         | 0.064 | 0.914 | 0.308             | 0.054                                                      | 0.055 | 0.944 |  |
| $NNMI_{CLR}(5,0.7,0.1;0.2)$ | 0.446             | 0.061                         | 0.067 | 0.842 | 0.304             | 0.054                                                      | 0.054 | 0.930 |  |
|                             |                   | Working models for $Y$ :      |       |       |                   | Five covariates with logit link                            |       |       |  |
|                             |                   | Working models for $\delta$ : |       |       |                   | Three covariates with logit link (misspecified scenario 2) |       |       |  |
| CE                          | 0.391             | 0.074                         | 0.075 | 0.960 | 0.288             | 0.065                                                      | 0.062 | 0.930 |  |
| PMI                         | 0.387             | 0.052                         | 0.050 | 0.918 | 0.292             | 0.048                                                      | 0.047 | 0.934 |  |
| $NNMI_{MLR}(5,0.4,0.4;0.2)$ | 0.401             | 0.055                         | 0.055 | 0.920 | 0.306             | 0.050                                                      | 0.053 | 0.928 |  |
| $NNMI_{MLR}(5,0.1,0.7;0.2)$ | 0.436             | 0.058                         | 0.061 | 0.868 | 0.297             | 0.049                                                      | 0.051 | 0.942 |  |
| $NNMI_{MLR}(5,0.7,0.1;0.2)$ | 0.393             | 0.054                         | 0.053 | 0.918 | 0.319             | 0.054                                                      | 0.055 | 0.924 |  |
| $NNMI_{CLR}(5,0.4,0.4;0.2)$ | 0.393             | 0.053                         | 0.052 | 0.924 | 0.314             | 0.051                                                      | 0.053 | 0.934 |  |
| $NNMI_{CLR}(5,0.1,0.7;0.2)$ | 0.382             | 0.055                         | 0.053 | 0.912 | 0.311             | 0.050                                                      | 0.053 | 0.940 |  |
| $NNMI_{CLR}(5,0.7,0.1;0.2)$ | 0.406             | 0.054                         | 0.053 | 0.924 | 0.322             | 0.052                                                      | 0.054 | 0.916 |  |

Est: Estimates of probabilities; SD: Empirical standard deviation; SE: Estimate of standard error; CR: Coverage rate of 95% confidence intervals; FO: fully observed; CC: Complete Cases; CE: Calibration estimator; PMI: Parametric Multiple Imputation;  $NNMI_{MLR}(NN, \omega_1, \omega_2, \omega_3)$ : the NNMI method using Multinomial Logistic Regressions, NN is the number of nearest neighbors and weights are  $\omega_1, \omega_2$ , and  $\omega_3$ ;  $NNMI_{CLR}$ : the NNMI method using Cumulative Logistic Regressions;  $K = 10$  imputed datasets are used for PMI and NNMI methods.

Table S9 Simulation results from probability estimation for  $Y$ , where  $Y$  is generated using a probit link function with five covariates,  $\delta$  is generated using a logit link function with extreme missingness probabilities (M2) based on five covariates,  $N = 200$

| Method                      | $Pr(Y = 1)=0.297$             |       |       |       | $Pr(Y = 2)=0.250$                                            |       |       |       |
|-----------------------------|-------------------------------|-------|-------|-------|--------------------------------------------------------------|-------|-------|-------|
|                             | Est                           | SD    | SE    | CR    | Est                                                          | SD    | SE    | CR    |
| FO                          | 0.297                         | 0.033 | 0.032 | 0.950 | 0.248                                                        | 0.030 | 0.030 | 0.956 |
| CC                          | 0.308                         | 0.043 | 0.044 | 0.952 | 0.333                                                        | 0.045 | 0.045 | 0.560 |
|                             | Working models for $Y$ :      |       |       |       | Five covariates with logit link<br>(misspecified scenario 3) |       |       |       |
|                             | Working models for $\delta$ : |       |       |       | Five covariates with logit link                              |       |       |       |
| CE                          | 0.298                         | 0.152 | 0.210 | 0.964 | 0.211                                                        | 0.138 | 0.236 | 0.980 |
| PMI                         | 0.302                         | 0.054 | 0.055 | 0.924 | 0.305                                                        | 0.053 | 0.054 | 0.860 |
| $NNMI_{MLR}(5,0.4,0.4;0.2)$ | 0.302                         | 0.059 | 0.059 | 0.918 | 0.290                                                        | 0.054 | 0.056 | 0.932 |
| $NNMI_{MLR}(5,0.1,0.7;0.2)$ | 0.307                         | 0.058 | 0.061 | 0.924 | 0.287                                                        | 0.056 | 0.057 | 0.924 |
| $NNMI_{MLR}(5,0.7,0.1;0.2)$ | 0.301                         | 0.058 | 0.059 | 0.932 | 0.291                                                        | 0.054 | 0.058 | 0.934 |
| $NNMI_{CLR}(5,0.4,0.4;0.2)$ | 0.301                         | 0.058 | 0.059 | 0.914 | 0.292                                                        | 0.053 | 0.056 | 0.916 |
| $NNMI_{CLR}(5,0.1,0.7;0.2)$ | 0.298                         | 0.057 | 0.058 | 0.916 | 0.292                                                        | 0.054 | 0.057 | 0.918 |
| $NNMI_{CLR}(5,0.7,0.1;0.2)$ | 0.303                         | 0.058 | 0.060 | 0.912 | 0.293                                                        | 0.054 | 0.057 | 0.928 |

Est: Estimates of probabilities; SD: Empirical standard deviation; SE: Estimate of standard error; CR: Coverage rate of 95% confidence intervals; FO: fully observed; CC: Complete Cases; CE: Calibration estimator; PMI: Parametric Multiple Imputation;  $NNMI_{MLR}(NN, \omega_1, \omega_2; \omega_3)$ : the NNMI method using Multinomial Logistic Regressions, NN is the number of nearest neighbors and weights are  $\omega_1, \omega_2$ , and  $\omega_3$ ;  $NNMI_{CLR}$ : the NNMI method using Cumulative Logistic Regressions;  $K = 10$  imputed datasets are used for PMI and NNMI methods.

Table S10 Simulation results from probability estimation for  $Y$ , where  $Y$  is generated using a logit link function with five covariates,  $\delta$  is generated using a probit link function with extreme missingness probabilities (M2) based on five covariates,  $N = 200$

| Method                      | $Pr(Y = 1)=0.386$ |                               |       |       | $Pr(Y = 2)=0.288$                                            |       |       |       |
|-----------------------------|-------------------|-------------------------------|-------|-------|--------------------------------------------------------------|-------|-------|-------|
|                             | Est               | SD                            | SE    | CR    | Est                                                          | SD    | SE    | CR    |
| FO                          | 0.388             | 0.035                         | 0.034 | 0.950 | 0.286                                                        | 0.033 | 0.032 | 0.936 |
| CC                          | 0.431             | 0.049                         | 0.047 | 0.826 | 0.380                                                        | 0.050 | 0.046 | 0.498 |
|                             |                   | Working models for $Y$ :      |       |       | Five covariates with logit link                              |       |       |       |
|                             |                   | Working models for $\delta$ : |       |       | Five covariates with logit link<br>(misspecified scenario 4) |       |       |       |
| CE                          | 0.398             | 0.144                         | 0.154 | 0.952 | 0.275                                                        | 0.156 | 0.167 | 0.966 |
| PMI                         | 0.388             | 0.055                         | 0.054 | 0.928 | 0.291                                                        | 0.049 | 0.050 | 0.924 |
| $NNMI_{MLR}(5,0.4,0.4;0.2)$ | 0.396             | 0.060                         | 0.062 | 0.926 | 0.306                                                        | 0.056 | 0.060 | 0.940 |
| $NNMI_{MLR}(5,0.1,0.7;0.2)$ | 0.420             | 0.066                         | 0.071 | 0.916 | 0.299                                                        | 0.055 | 0.060 | 0.940 |
| $NNMI_{MLR}(5,0.7,0.1;0.2)$ | 0.392             | 0.060                         | 0.060 | 0.924 | 0.317                                                        | 0.059 | 0.065 | 0.934 |
| $NNMI_{CLR}(5,0.4,0.4;0.2)$ | 0.392             | 0.057                         | 0.058 | 0.930 | 0.316                                                        | 0.055 | 0.061 | 0.944 |
| $NNMI_{CLR}(5,0.1,0.7;0.2)$ | 0.375             | 0.060                         | 0.060 | 0.914 | 0.316                                                        | 0.057 | 0.061 | 0.960 |
| $NNMI_{CLR}(5,0.7,0.1;0.2)$ | 0.406             | 0.060                         | 0.059 | 0.920 | 0.318                                                        | 0.059 | 0.061 | 0.914 |

Est: Estimates of probabilities; SD: Empirical standard deviation; SE: Estimate of standard error; CR: Coverage rate of 95% confidence intervals; FO: fully observed; CC: Complete Cases; CE: Calibration estimator; PMI: Parametric Multiple Imputation;  $NNMI_{MLR}(NN, \omega_1, \omega_2, \omega_3)$ : the NNMI method using Multinomial Logistic Regressions, NN is the number of nearest neighbors and weights are  $\omega_1, \omega_2$ , and  $\omega_3$ ;  $NNMI_{CLR}$ : the NNMI method using Cumulative Logistic Regressions;  $K = 10$  imputed datasets are used for PMI and NNMI methods.

Table S11 Simulation results from probability estimation for  $Y$ , where  $Y$  is generated using a probit link function with five covariates,  $\delta$  is generated using a probit link function with extreme missingness probabilities (M2) based on five covariates,  $N = 200$

| Method                      | $Pr(Y = 1)=0.297$ |                               |       |       | $Pr(Y = 2)=0.250$                                            |       |       |       |
|-----------------------------|-------------------|-------------------------------|-------|-------|--------------------------------------------------------------|-------|-------|-------|
|                             | Est               | SD                            | SE    | CR    | Est                                                          | SD    | SE    | CR    |
| FO                          | 0.297             | 0.033                         | 0.032 | 0.950 | 0.248                                                        | 0.030 | 0.030 | 0.956 |
| CC                          | 0.308             | 0.044                         | 0.044 | 0.946 | 0.341                                                        | 0.046 | 0.045 | 0.474 |
|                             |                   | Working models for $Y$ :      |       |       | Five covariates with logit link<br>(misspecified scenario 5) |       |       |       |
|                             |                   | Working models for $\delta$ : |       |       | Five covariates with logit link<br>(misspecified scenario 5) |       |       |       |
| CE                          | 0.318             | 0.204                         | 0.218 | 0.956 | 0.264                                                        | 0.188 | 0.245 | 0.974 |
| PMI                         | 0.303             | 0.060                         | 0.059 | 0.920 | 0.322                                                        | 0.063 | 0.061 | 0.822 |
| $NNMI_{MLR}(5,0.4,0.4;0.2)$ | 0.306             | 0.065                         | 0.065 | 0.930 | 0.307                                                        | 0.064 | 0.065 | 0.902 |
| $NNMI_{MLR}(5,0.1,0.7;0.2)$ | 0.312             | 0.067                         | 0.069 | 0.936 | 0.304                                                        | 0.064 | 0.066 | 0.906 |
| $NNMI_{MLR}(5,0.7,0.1;0.2)$ | 0.303             | 0.064                         | 0.066 | 0.928 | 0.307                                                        | 0.064 | 0.065 | 0.904 |
| $NNMI_{CLR}(5,0.4,0.4;0.2)$ | 0.304             | 0.064                         | 0.065 | 0.916 | 0.308                                                        | 0.061 | 0.063 | 0.888 |
| $NNMI_{CLR}(5,0.1,0.7;0.2)$ | 0.305             | 0.066                         | 0.067 | 0.924 | 0.306                                                        | 0.062 | 0.065 | 0.908 |
| $NNMI_{CLR}(5,0.7,0.1;0.2)$ | 0.305             | 0.065                         | 0.066 | 0.914 | 0.311                                                        | 0.063 | 0.066 | 0.908 |

Est: Estimates of probabilities; SD: Empirical standard deviation; SE: Estimate of standard error; CR: Coverage rate of 95% confidence intervals; FO: fully observed; CC: Complete Cases; CE: Calibration estimator; PMI: Parametric Multiple Imputation;  $NNMI_{MLR}(NN, \omega_1, \omega_2, \omega_3)$ : the NNMI method using Multinomial Logistic Regressions, NN is the number of nearest neighbors and weights are  $\omega_1, \omega_2$ , and  $\omega_3$ ;  $NNMI_{CLR}$ : the NNMI method using Cumulative Logistic Regressions;  $K = 10$  imputed datasets are used for PMI and NNMI methods.



Table S12 Simulation results from probability estimation for  $Y$ , where  $Y$  is generated using a logit link function with five covariates,  $\delta$  is generated using a logit link function with not extreme missingness probabilities (M1) based on five covariates,  $N = 400$

| Method                      | $Pr(Y = 1) = 0.386$ |                               |       |       | $Pr(Y = 2) = 0.288$                                           |       |       |       |
|-----------------------------|---------------------|-------------------------------|-------|-------|---------------------------------------------------------------|-------|-------|-------|
|                             | Est                 | SD                            | SE    | CR    | Est                                                           | SD    | SE    | CR    |
| FO                          | 0.386               | 0.023                         | 0.024 | 0.960 | 0.286                                                         | 0.023 | 0.023 | 0.934 |
| CC                          | 0.439               | 0.034                         | 0.035 | 0.674 | 0.340                                                         | 0.034 | 0.033 | 0.670 |
|                             |                     | Working models for $Y$ :      |       |       | Five covariates with logit link                               |       |       |       |
|                             |                     | Working models for $\delta$ : |       |       | Five covariates with logit link                               |       |       |       |
| CE                          | 0.388               | 0.036                         | 0.036 | 0.948 | 0.286                                                         | 0.038 | 0.036 | 0.924 |
| PMI                         | 0.387               | 0.030                         | 0.032 | 0.956 | 0.287                                                         | 0.033 | 0.031 | 0.946 |
| $NNMI_{MLR}(5,0.4,0.4;0.2)$ | 0.388               | 0.031                         | 0.033 | 0.950 | 0.288                                                         | 0.034 | 0.033 | 0.942 |
| $NNMI_{MLR}(5,0.1,0.7;0.2)$ | 0.390               | 0.033                         | 0.034 | 0.958 | 0.287                                                         | 0.034 | 0.033 | 0.932 |
| $NNMI_{MLR}(5,0.7,0.1;0.2)$ | 0.386               | 0.031                         | 0.032 | 0.960 | 0.291                                                         | 0.035 | 0.033 | 0.942 |
| $NNMI_{CLR}(5,0.4,0.4;0.2)$ | 0.386               | 0.031                         | 0.032 | 0.952 | 0.295                                                         | 0.035 | 0.034 | 0.936 |
| $NNMI_{CLR}(5,0.1,0.7;0.2)$ | 0.380               | 0.032                         | 0.032 | 0.944 | 0.295                                                         | 0.036 | 0.034 | 0.938 |
| $NNMI_{CLR}(5,0.7,0.1;0.2)$ | 0.390               | 0.031                         | 0.033 | 0.952 | 0.294                                                         | 0.035 | 0.034 | 0.938 |
|                             |                     | Working models for $Y$ :      |       |       | Three covariates with logit link<br>(misspecified scenario 1) |       |       |       |
|                             |                     | Working models for $\delta$ : |       |       | Five covariates with logit link                               |       |       |       |
| CE                          | 0.311               | 0.057                         | 0.057 | 0.760 | 0.288                                                         | 0.041 | 0.041 | 0.932 |
| PMI                         | 0.464               | 0.037                         | 0.038 | 0.436 | 0.285                                                         | 0.032 | 0.030 | 0.928 |
| $NNMI_{MLR}(5,0.4,0.4;0.2)$ | 0.409               | 0.035                         | 0.038 | 0.932 | 0.290                                                         | 0.034 | 0.033 | 0.948 |
| $NNMI_{MLR}(5,0.1,0.7;0.2)$ | 0.407               | 0.035                         | 0.038 | 0.944 | 0.289                                                         | 0.034 | 0.033 | 0.934 |
| $NNMI_{MLR}(5,0.7,0.1;0.2)$ | 0.407               | 0.035                         | 0.038 | 0.942 | 0.291                                                         | 0.034 | 0.033 | 0.936 |
| $NNMI_{CLR}(5,0.4,0.4;0.2)$ | 0.415               | 0.035                         | 0.038 | 0.910 | 0.292                                                         | 0.034 | 0.033 | 0.946 |
| $NNMI_{CLR}(5,0.1,0.7;0.2)$ | 0.411               | 0.035                         | 0.038 | 0.928 | 0.292                                                         | 0.034 | 0.033 | 0.942 |
| $NNMI_{CLR}(5,0.7,0.1;0.2)$ | 0.413               | 0.035                         | 0.038 | 0.918 | 0.292                                                         | 0.034 | 0.033 | 0.940 |
|                             |                     | Working models for $Y$ :      |       |       | Five covariates with logit link                               |       |       |       |
|                             |                     | Working models for $\delta$ : |       |       | Three covariates with logit link<br>(misspecified scenario 2) |       |       |       |
| CE                          | 0.389               | 0.032                         | 0.033 | 0.954 | 0.285                                                         | 0.033 | 0.032 | 0.942 |
| PMI                         | 0.387               | 0.030                         | 0.032 | 0.956 | 0.287                                                         | 0.033 | 0.031 | 0.946 |
| $NNMI_{MLR}(5,0.4,0.4;0.2)$ | 0.392               | 0.031                         | 0.033 | 0.962 | 0.292                                                         | 0.035 | 0.033 | 0.928 |
| $NNMI_{MLR}(5,0.1,0.7;0.2)$ | 0.402               | 0.033                         | 0.034 | 0.954 | 0.289                                                         | 0.034 | 0.032 | 0.942 |
| $NNMI_{MLR}(5,0.7,0.1;0.2)$ | 0.390               | 0.031                         | 0.032 | 0.958 | 0.297                                                         | 0.035 | 0.033 | 0.938 |
| $NNMI_{CLR}(5,0.4,0.4;0.2)$ | 0.387               | 0.031                         | 0.032 | 0.950 | 0.298                                                         | 0.035 | 0.033 | 0.946 |
| $NNMI_{CLR}(5,0.1,0.7;0.2)$ | 0.382               | 0.031                         | 0.032 | 0.946 | 0.298                                                         | 0.035 | 0.033 | 0.938 |
| $NNMI_{CLR}(5,0.7,0.1;0.2)$ | 0.392               | 0.031                         | 0.032 | 0.958 | 0.302                                                         | 0.034 | 0.033 | 0.936 |

Est: Estimates of probabilities; SD: Empirical standard deviation; SE: Estimate of standard error; CR: Coverage rate of 95% confidence intervals; FO: fully observed; CC: Complete Cases; CE: Calibration estimator; PMI: Parametric Multiple Imputation;  $NNMI_{MLR}(NN, \omega_1, \omega_2, \omega_3)$ : the NNMI method using Multinomial Logistic Regressions, NN is the number of nearest neighbors and weights are  $\omega_1, \omega_2$ , and  $\omega_3$ ;  $NNMI_{CLR}$ : the NNMI method using Cumulative Logistic Regressions;  $K = 50$  imputed datasets are used for PMI and NNMI methods.

Table S13 Simulation results from NNMI, compared with other methods including Latent Class Model (LCM), from probability estimation for  $Y$ , where  $Y$  is generated using a logit link function with five covariates,  $\delta$  is generated using a logit link function with not extreme missingness probabilities (M1) based on five covariates,  $N = 400$

| Method                      | $Pr(Y = 1) = 0.386$ |                               |       |       | $Pr(Y = 2) = 0.288$                                           |       |       |       |
|-----------------------------|---------------------|-------------------------------|-------|-------|---------------------------------------------------------------|-------|-------|-------|
|                             | Est                 | SD                            | SE    | CR    | Est                                                           | SD    | SE    | CR    |
| FO                          | 0.386               | 0.023                         | 0.024 | 0.960 | 0.286                                                         | 0.023 | 0.023 | 0.934 |
| CC                          | 0.439               | 0.034                         | 0.035 | 0.674 | 0.340                                                         | 0.034 | 0.033 | 0.670 |
|                             |                     | Working models for $Y$ :      |       |       | Five covariates with logit link                               |       |       |       |
|                             |                     | Working models for $\delta$ : |       |       | Five covariates with logit link                               |       |       |       |
| CE                          | 0.388               | 0.036                         | 0.036 | 0.948 | 0.286                                                         | 0.038 | 0.036 | 0.924 |
| PMI                         | 0.387               | 0.030                         | 0.032 | 0.954 | 0.287                                                         | 0.034 | 0.032 | 0.930 |
| LCM                         | 0.396               | 0.033                         | 0.043 | 0.978 | 0.319                                                         | 0.035 | 0.046 | 0.954 |
| $NNMI_{MLR}(5,0.4,0.4;0.2)$ | 0.387               | 0.032                         | 0.033 | 0.952 | 0.288                                                         | 0.036 | 0.033 | 0.936 |
| $NNMI_{MLR}(5,0.1,0.7;0.2)$ | 0.389               | 0.033                         | 0.034 | 0.956 | 0.288                                                         | 0.035 | 0.033 | 0.930 |
| $NNMI_{MLR}(5,0.7,0.1;0.2)$ | 0.386               | 0.032                         | 0.033 | 0.956 | 0.290                                                         | 0.036 | 0.034 | 0.926 |
| $NNMI_{CLR}(5,0.4,0.4;0.2)$ | 0.385               | 0.032                         | 0.033 | 0.948 | 0.294                                                         | 0.036 | 0.034 | 0.916 |
| $NNMI_{CLR}(5,0.1,0.7;0.2)$ | 0.381               | 0.032                         | 0.033 | 0.944 | 0.295                                                         | 0.037 | 0.034 | 0.928 |
| $NNMI_{CLR}(5,0.7,0.1;0.2)$ | 0.390               | 0.032                         | 0.033 | 0.950 | 0.294                                                         | 0.037 | 0.034 | 0.936 |
|                             |                     | Working models for $Y$ :      |       |       | Three covariates with logit link<br>(misspecified scenario 1) |       |       |       |
|                             |                     | Working models for $\delta$ : |       |       | Five covariates with logit link                               |       |       |       |
| CE                          | 0.311               | 0.057                         | 0.057 | 0.760 | 0.288                                                         | 0.041 | 0.041 | 0.932 |
| PMI                         | 0.464               | 0.037                         | 0.038 | 0.454 | 0.285                                                         | 0.032 | 0.031 | 0.922 |
| LCM                         | 0.460               | 0.038                         | 0.049 | 0.694 | 0.299                                                         | 0.034 | 0.043 | 0.974 |
| $NNMI_{MLR}(5,0.4,0.4;0.2)$ | 0.410               | 0.036                         | 0.039 | 0.932 | 0.290                                                         | 0.035 | 0.033 | 0.926 |
| $NNMI_{MLR}(5,0.1,0.7;0.2)$ | 0.407               | 0.036                         | 0.039 | 0.940 | 0.290                                                         | 0.035 | 0.033 | 0.932 |
| $NNMI_{MLR}(5,0.7,0.1;0.2)$ | 0.408               | 0.035                         | 0.039 | 0.930 | 0.291                                                         | 0.035 | 0.033 | 0.928 |
| $NNMI_{CLR}(5,0.4,0.4;0.2)$ | 0.415               | 0.036                         | 0.038 | 0.896 | 0.292                                                         | 0.034 | 0.033 | 0.940 |
| $NNMI_{CLR}(5,0.1,0.7;0.2)$ | 0.412               | 0.036                         | 0.039 | 0.916 | 0.292                                                         | 0.035 | 0.033 | 0.934 |
| $NNMI_{CLR}(5,0.7,0.1;0.2)$ | 0.413               | 0.035                         | 0.039 | 0.926 | 0.291                                                         | 0.035 | 0.034 | 0.954 |
|                             |                     | Working models for $Y$ :      |       |       | Five covariates with logit link                               |       |       |       |
|                             |                     | Working models for $\delta$ : |       |       | Three covariates with logit link<br>(misspecified scenario 2) |       |       |       |
| CE                          | 0.389               | 0.032                         | 0.033 | 0.954 | 0.285                                                         | 0.033 | 0.032 | 0.942 |
| PMI                         | 0.387               | 0.030                         | 0.032 | 0.954 | 0.287                                                         | 0.034 | 0.032 | 0.930 |
| LCM                         | 0.396               | 0.033                         | 0.043 | 0.978 | 0.319                                                         | 0.035 | 0.046 | 0.954 |
| $NNMI_{MLR}(5,0.4,0.4;0.2)$ | 0.393               | 0.032                         | 0.033 | 0.962 | 0.292                                                         | 0.035 | 0.033 | 0.936 |
| $NNMI_{MLR}(5,0.1,0.7;0.2)$ | 0.402               | 0.034                         | 0.035 | 0.936 | 0.289                                                         | 0.035 | 0.033 | 0.926 |
| $NNMI_{MLR}(5,0.7,0.1;0.2)$ | 0.389               | 0.031                         | 0.033 | 0.960 | 0.297                                                         | 0.036 | 0.034 | 0.936 |
| $NNMI_{CLR}(5,0.4,0.4;0.2)$ | 0.387               | 0.031                         | 0.032 | 0.958 | 0.298                                                         | 0.035 | 0.033 | 0.936 |
| $NNMI_{CLR}(5,0.1,0.7;0.2)$ | 0.382               | 0.031                         | 0.033 | 0.956 | 0.298                                                         | 0.035 | 0.034 | 0.940 |
| $NNMI_{CLR}(5,0.7,0.1;0.2)$ | 0.392               | 0.031                         | 0.033 | 0.954 | 0.302                                                         | 0.035 | 0.034 | 0.920 |

Est: Estimates of probabilities; SD: Empirical standard deviation; SE: Estimate of standard error; CR: Coverage rate of 95% confidence intervals; FO: fully observed; CC: Complete Cases; CE: Calibration estimator; PMI: Parametric Multiple Imputation; LCM: Latent Class Model;  $NNMI_{MLR}(NN, \omega_1, \omega_2; \omega_3)$ : the NNMI method using Multinomial Logistic Regressions, NN is the number of nearest neighbors and weights are  $\omega_1, \omega_2$ , and  $\omega_3$ ;  $NNMI_{CLR}$ : the NNMI method using Cumulative Logistic Regressions;  $K = 10$  imputed datasets are used for PMI and NNMI methods.
